# Supplementary material for: Synthesis and investigations of In2S3:Ho3+quantum dots on doping induced changes
Source: Royal Society of Chemistry journal article supplement (doi:10.1039/c6ce02304e), 2017-01-01
Supplement: c6ce02304e1.pdf [file c6ce02304e1.pdf]

**Supplementary Information**

**Synthesis and investigations of  $\text{In}_2\text{S}_3\text{:Ho}^{3+}$  quantum dots on doping  
induce changes**

Zhifang Li, Mingyan Chuai, Qi Zhao, Tianye Yang, Hai Yu and Mingzhe Zhang\*

*State Key Laboratory of Superhard Materials, Jilin University, Changchun, Jilin  
130012, China.*

*E-mail address:* [zhangmz@jlu.edu.cn](mailto:zhangmz@jlu.edu.cn)

## Experimental section

### sample preparation and growth mechanism

Figure S1 presents the synthetic facility of  $\text{In}_2\text{S}_3\text{:Ho}^{3+}$  nanoparticles by an easily reproducible gas-liquid phase chemical deposition (this is an effective atomization doping method). The sufficiently stirring reactive solution is atomized to form the fine droplets with the average diameter of 2-4  $\mu\text{m}$  by using an ultrasonic nebulizer (the upper left portion of Fig. S1). The fog droplets will react with the  $\text{H}_2\text{S}$  gas taken by the flowing nitrogen in condensers with circulating water (25  $^\circ\text{C}$ ). Finally, the reaction products were collected in a flat bottom flask placed in an ultrasonic water bath (the bottom left portion of Fig. S1). The waste gas was absorbed by the  $\text{NaOH}$  solution to avoid air pollution.

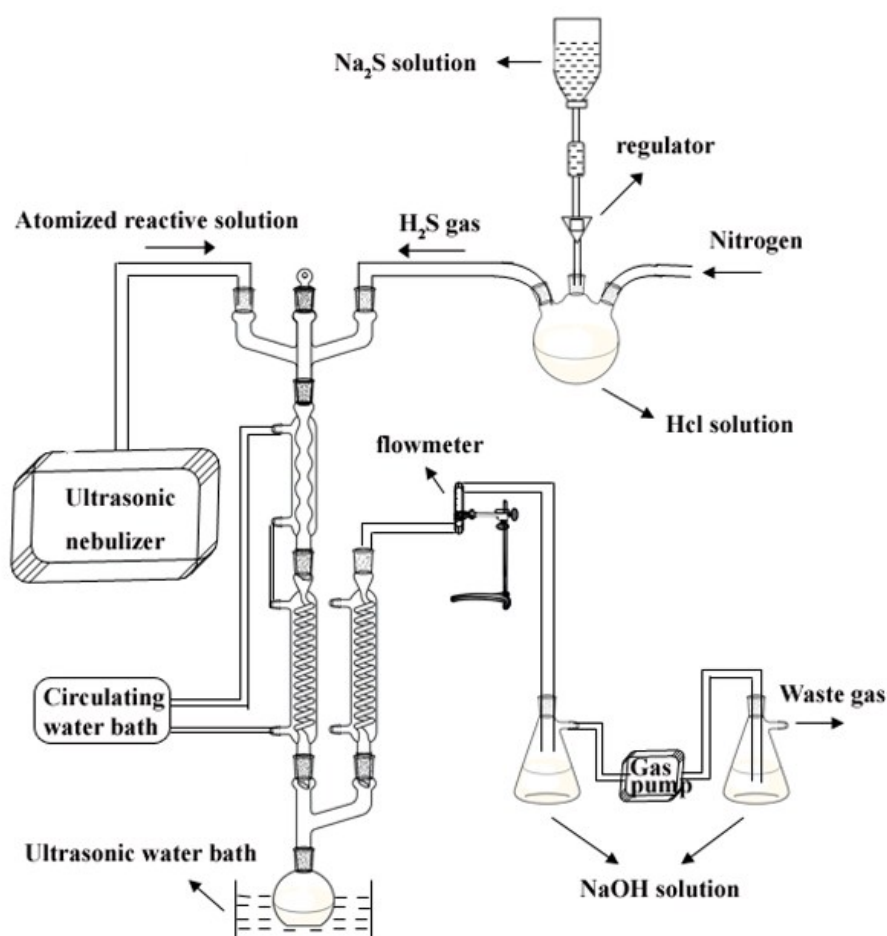

**Fig. S1** The synthetic facility of  $\text{In}_2\text{S}_3\text{:Ho}^{3+}$  nanoparticles.

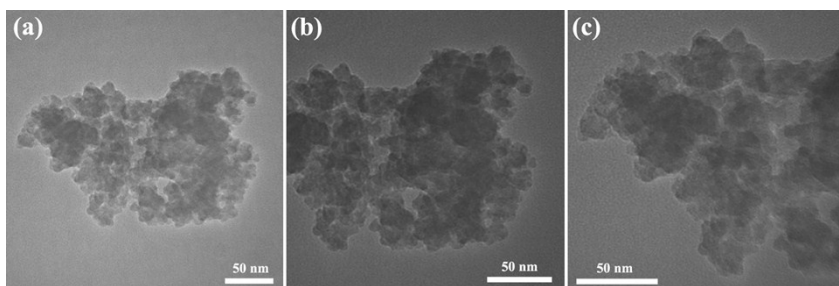

**Fig. S2** (a) A low-magnification TEM image, (b) enlarged TEM image, (c) high-magnification TEM image of  $\text{In}_2\text{S}_3:\text{Ho}^{3+}$  nanoparticles (concentration of dopant 0.75 at. %).

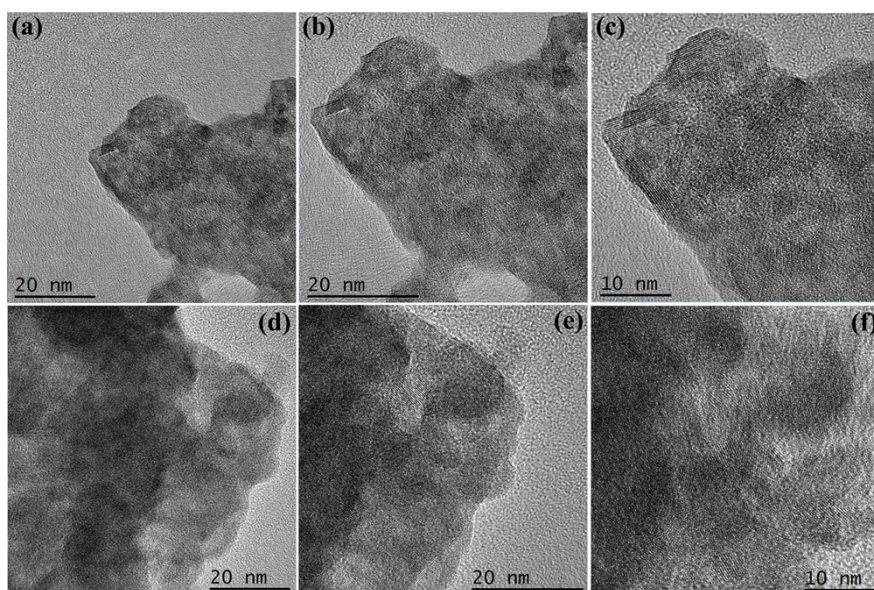

**Fig. S3** HRTEM images with different magnification. (a), (b) and (c) for  $\text{In}_2\text{S}_3:\text{Ho}^{3+}$  nanoparticles (concentration of dopant 0.75 at. %); (d), (e) and (f) for pure  $\text{In}_2\text{S}_3$  nanoparticles.

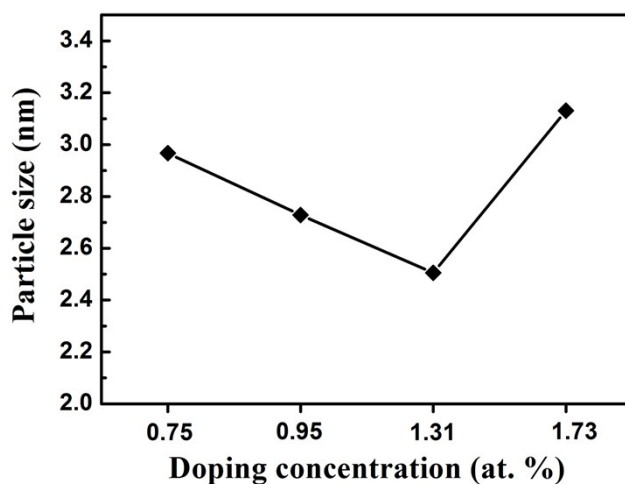

**Fig. S4** The effect of  $\text{Ho}^{3+}$  concentration on the particle sizes of  $\text{In}_2\text{S}_3:\text{Ho}^{3+}$  nanoparticles.

#### First-principles calculations

As shown in Figure S5, two conventional cell models have been built. Figure S5a is corresponding to the ideal system of pure  $\text{In}_2\text{S}_3$  ( $\text{In}_{16}\text{S}_{24}$ ) with the optimized lattice constants ( $a = 10.774 \text{ \AA}$ ), which agree well with the experimental values. Figure S5b is corresponding to  $\text{In}_{15}\text{Ho}_1\text{S}_{24}$ .

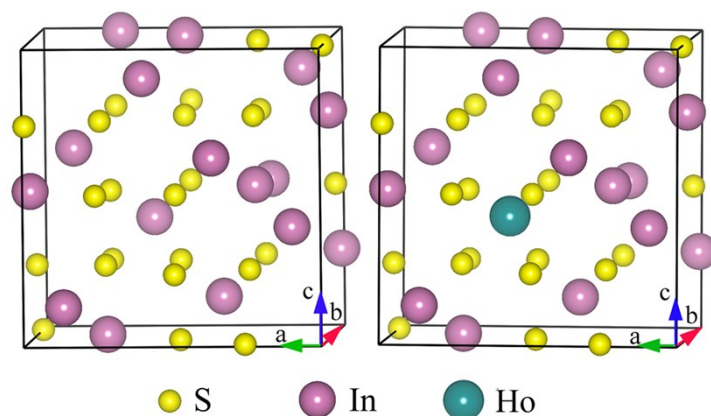

**Fig. S5** Two calculation models: (a) the ideal system with no defect and doping ( $\text{In}_{16}\text{S}_{24}$ ); (b) one In atom replaced by one Ho atom ( $\text{Ho}_{\text{In}}$ ) ( $\text{In}_{15}\text{Ho}_1\text{S}_{24}$ ).

| Sample<br>(the molar concentration<br>ratios of $\text{Ho}^{3+}$ and $\text{In}^{3+}$ ) | ICP         |             |                       | EDX          |              |                       |
|-----------------------------------------------------------------------------------------|-------------|-------------|-----------------------|--------------|--------------|-----------------------|
|                                                                                         | In<br>(ppm) | Ho<br>(ppm) | Ho/In<br>(Mass ratio) | In<br>(wt %) | Ho<br>(wt %) | Ho/In<br>(Mass ratio) |
| <b>0.02</b>                                                                             | 29.25       | 0.825       | 0.0282                | 68.26        | 1.91         | 0.0279                |
| <b>0.04</b>                                                                             | 26.14       | 0.923       | 0.0353                | 68.65        | 2.38         | 0.0346                |
| <b>0.06</b>                                                                             | 25.02       | 1.180       | 0.0472                | 68.28        | 3.24         | 0.0474                |
| <b>0.08</b>                                                                             | 26.19       | 1.370       | 0.0523                | 73.80        | 3.89         | 0.0527                |

**Table S1.** Comparison of different doping concentrations In  $\text{In}_2\text{S}_3\text{:Ho}^{3+}$  nanoparticles by the ICP and EDX methods.
